# Supplementary material for: Infrared identification of the Criegee intermediates syn- and anti-CH3CHOO, and their distinct conformation-dependent reactivity
Source: PubMed Central journal article supplement (PMC4432623; doi:10.1038/ncomms8012), 2015-05-11
Supplement: ncomms8012-s1.pdf [file ncomms8012-s1.pdf]

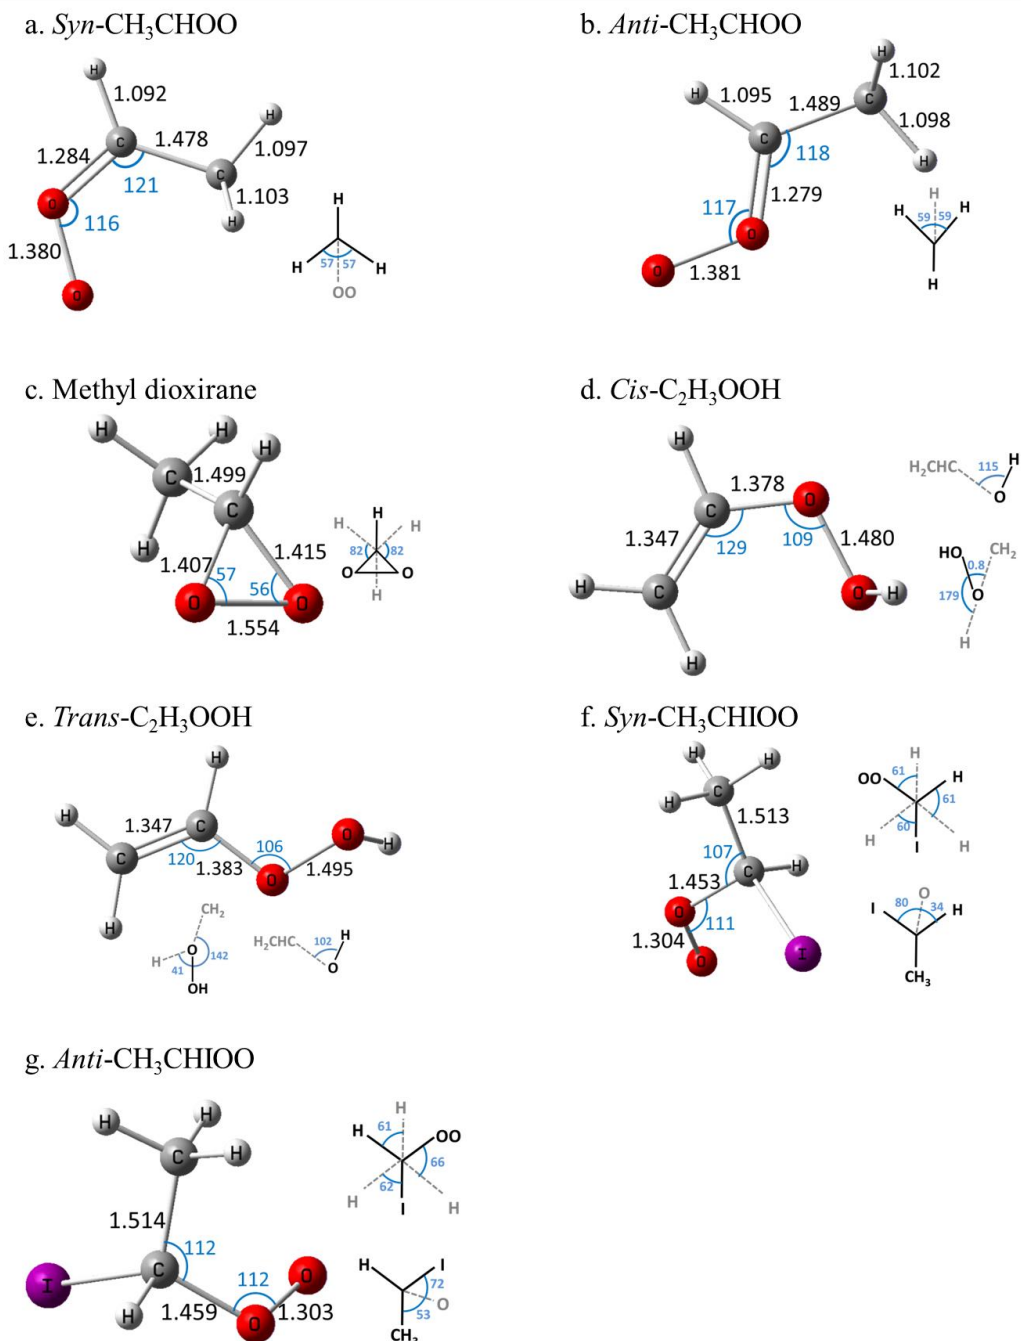

**Supplementary Figure 1 | Geometries of possible carriers of the observed spectrum. a, *syn*-CH<sub>3</sub>CHOO, b, *anti*-CH<sub>3</sub>CHOO, c, methyl dioxirane, d, *cis*-vinyl hydroperoxide, and e, *trans*-vinyl hydroperoxide predicted with the NEVPT2(8,8)/aug-cc-pVDZ method, and f, *syn*-CH<sub>3</sub>CHIOO and g, *anti*-CH<sub>3</sub>CHIOO predicted with the NEVPT2(1,1)/aug-cc-pVDZ method. The bond distances are given in Å (black) and the bond angles are given in degree (blue).**

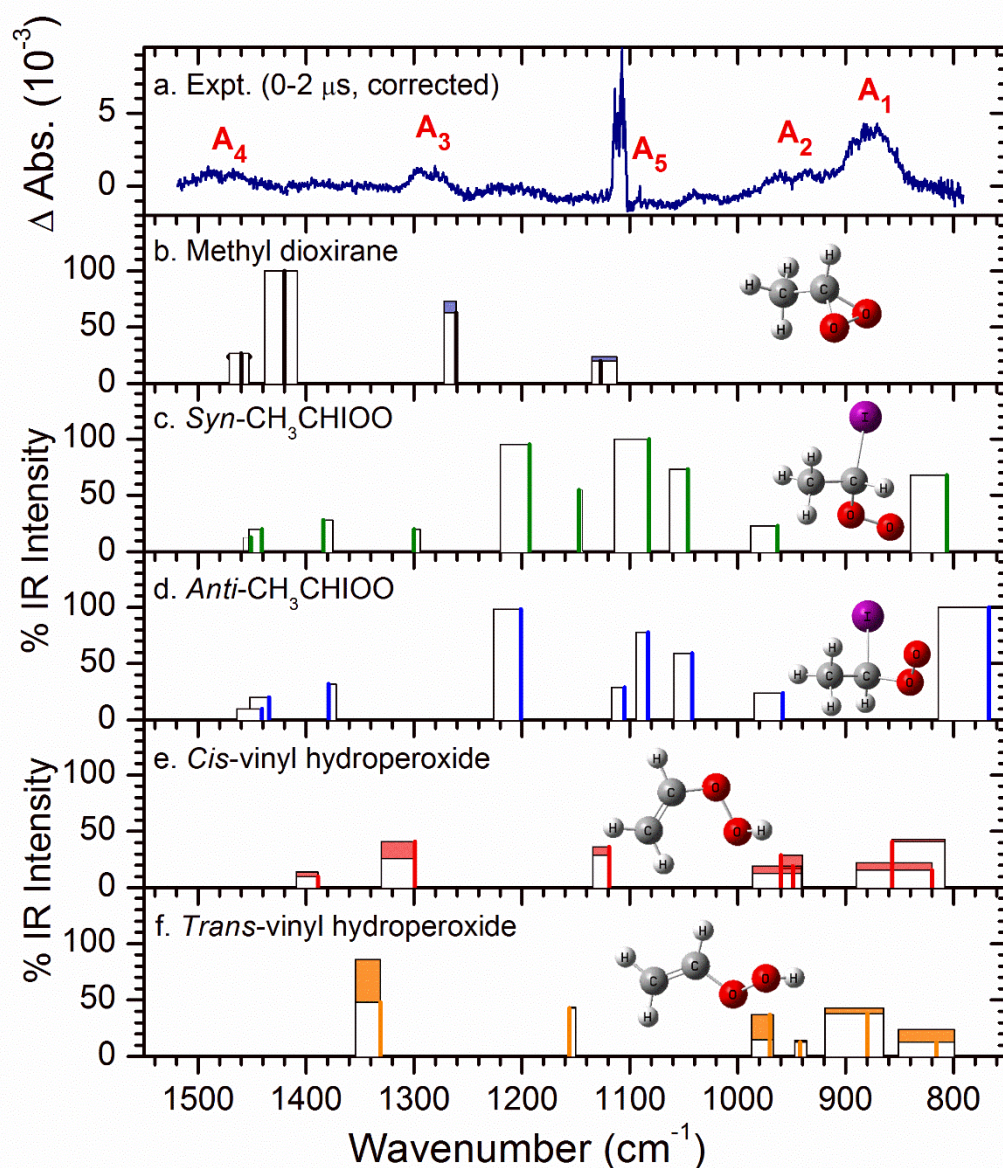

**Supplementary Figure 2 | Comparison of observed spectra with predicted stick spectra of possible carriers in the CH<sub>3</sub>CHOO + O<sub>2</sub> system. a**, experimental spectrum taken from Fig. 1D. New features are indicated as A<sub>1</sub>–A<sub>5</sub>. Resolution is 0.5 cm<sup>-1</sup>. **b**, possible ranges of anharmonic vibrational wavenumbers and IR intensities (Tables S3–S5) of methyl dioxirane, **c**, *syn*-CH<sub>3</sub>CHIOO, **d**, *anti*-CH<sub>3</sub>CHIOO, **e**, *cis*-vinyl hydroperoxide, and **f**, *trans*-vinyl hydroperoxide predicted with various methods shown as boxes. Thick lines indicate those predicted with the B3LYP/aug-cc-pVTZ-pp method (for CH<sub>3</sub>CHIOO) or the VSCF/MP2/aug-cc-pVDZ method (for methyl dioxirane and vinyl hydroperoxide).

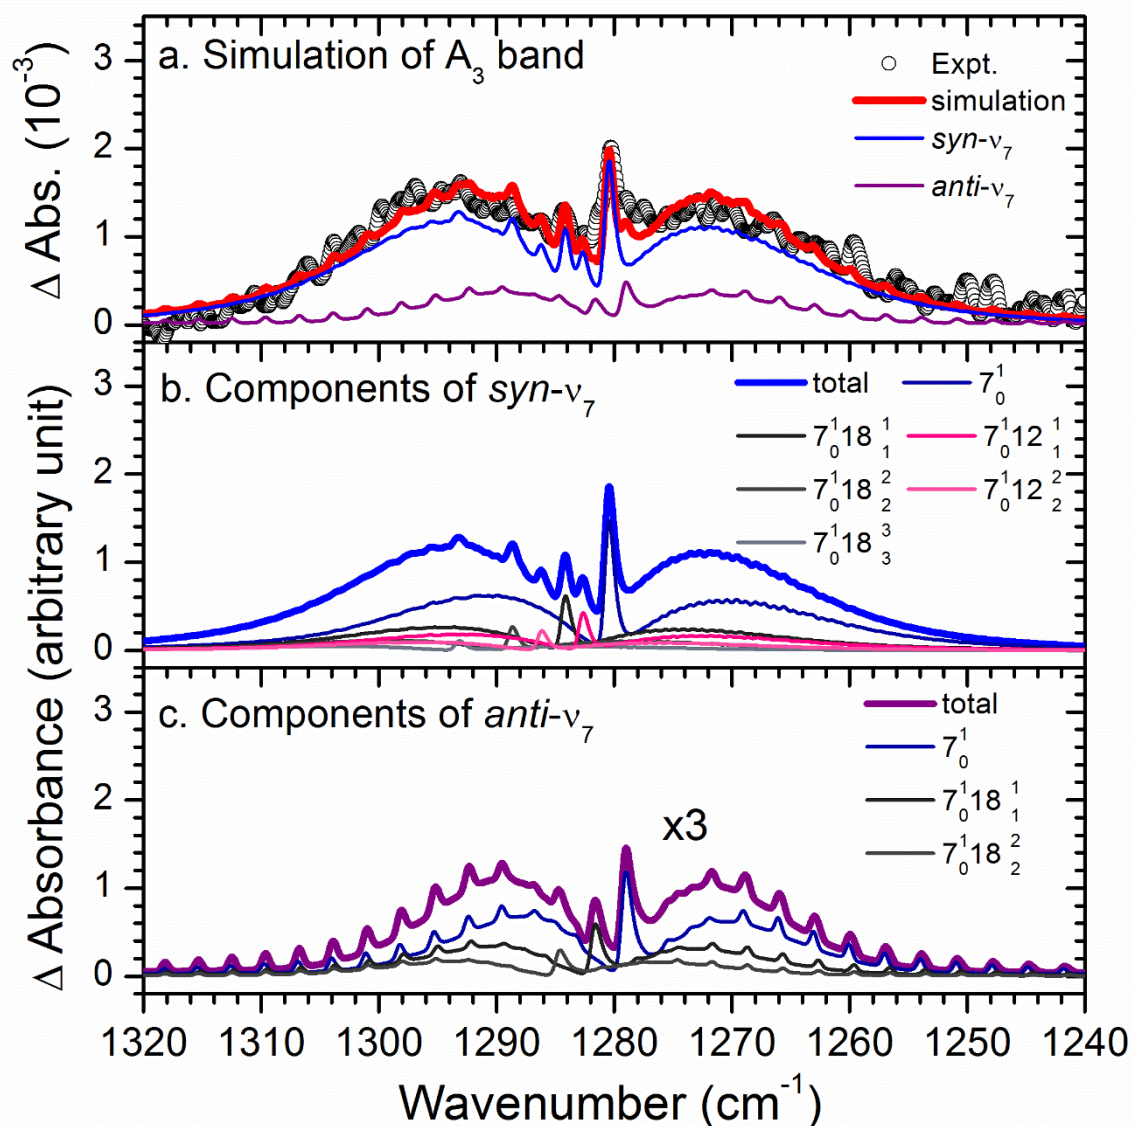

**Supplementary Figure 3 | Spectral simulation of band  $A_3$ .** **a**, comparison of experimental data (open circles) with simulated spectrum (thick solid red line); contributions of  $v_7$  of  $\text{syn-CH}_3\text{CHOO}$  and  $\text{anti-CH}_3\text{CHOO}$  are shown with thin lines. Spectral width is  $0.64 \text{ cm}^{-1}$ . **b**, contributions of fundamental and hot bands of  $v_7$  of  $\text{syn-CH}_3\text{CHOO}$ . **c**, contributions of fundamental and hot bands of  $v_7$  of  $\text{anti-CH}_3\text{CHOO}$ .

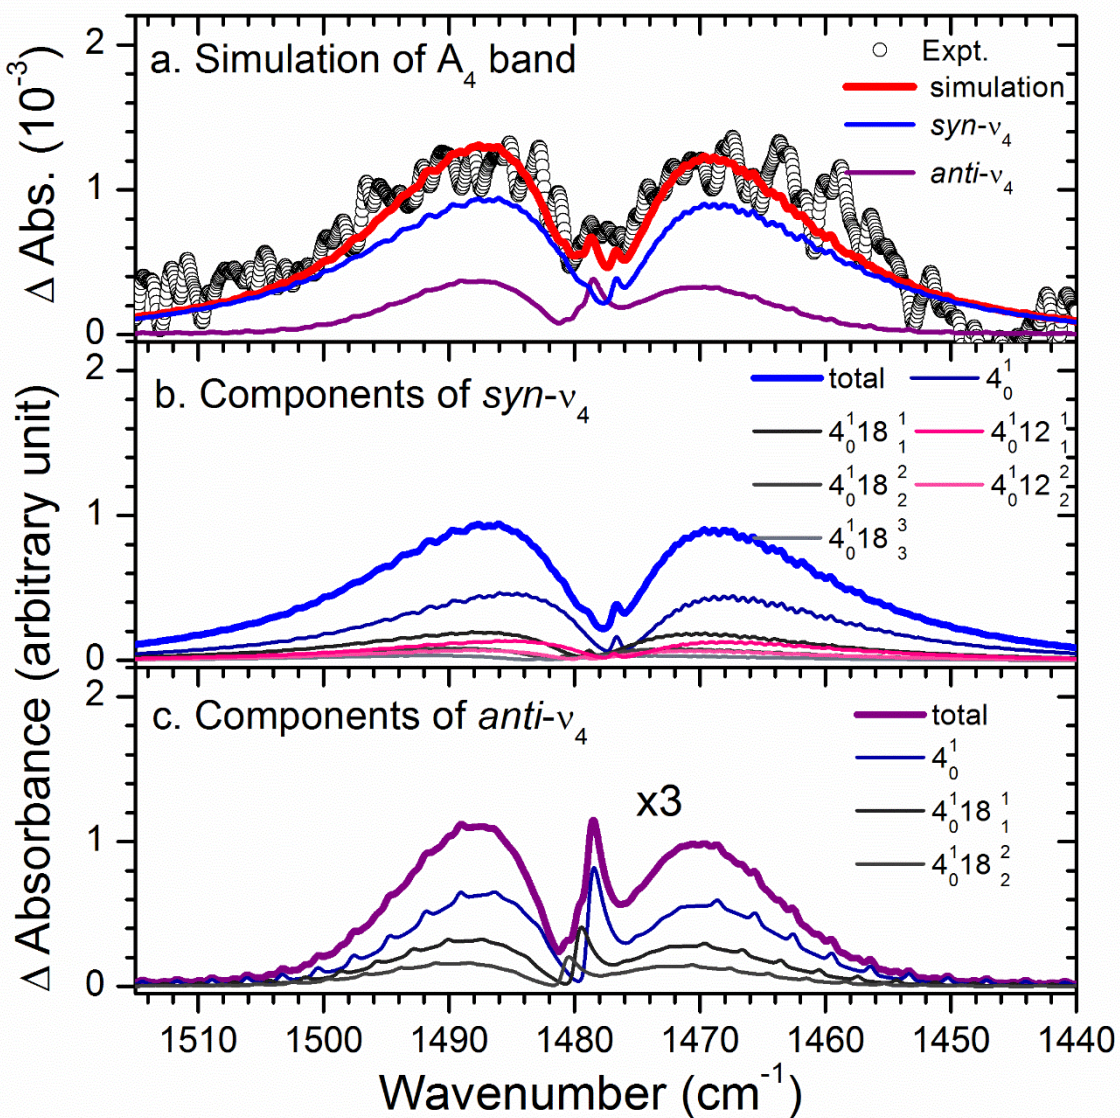

**Supplementary Figure 4 | Spectral simulation of band  $A_4$ .** **a**, comparison of experimental data (open circles) with simulated spectrum (thick solid red line); contributions of  $v_4$  of  $\text{syn-CH}_3\text{CHOO}$  and  $\text{anti-CH}_3\text{CHOO}$  are shown with thin lines. Spectral width is  $0.64 \text{ cm}^{-1}$ . **b**, contributions of fundamental and hot bands of  $v_4$  of  $\text{syn-CH}_3\text{CHOO}$ . **c**, contributions of fundamental and hot bands of  $v_4$  of  $\text{anti-CH}_3\text{CHOO}$ .

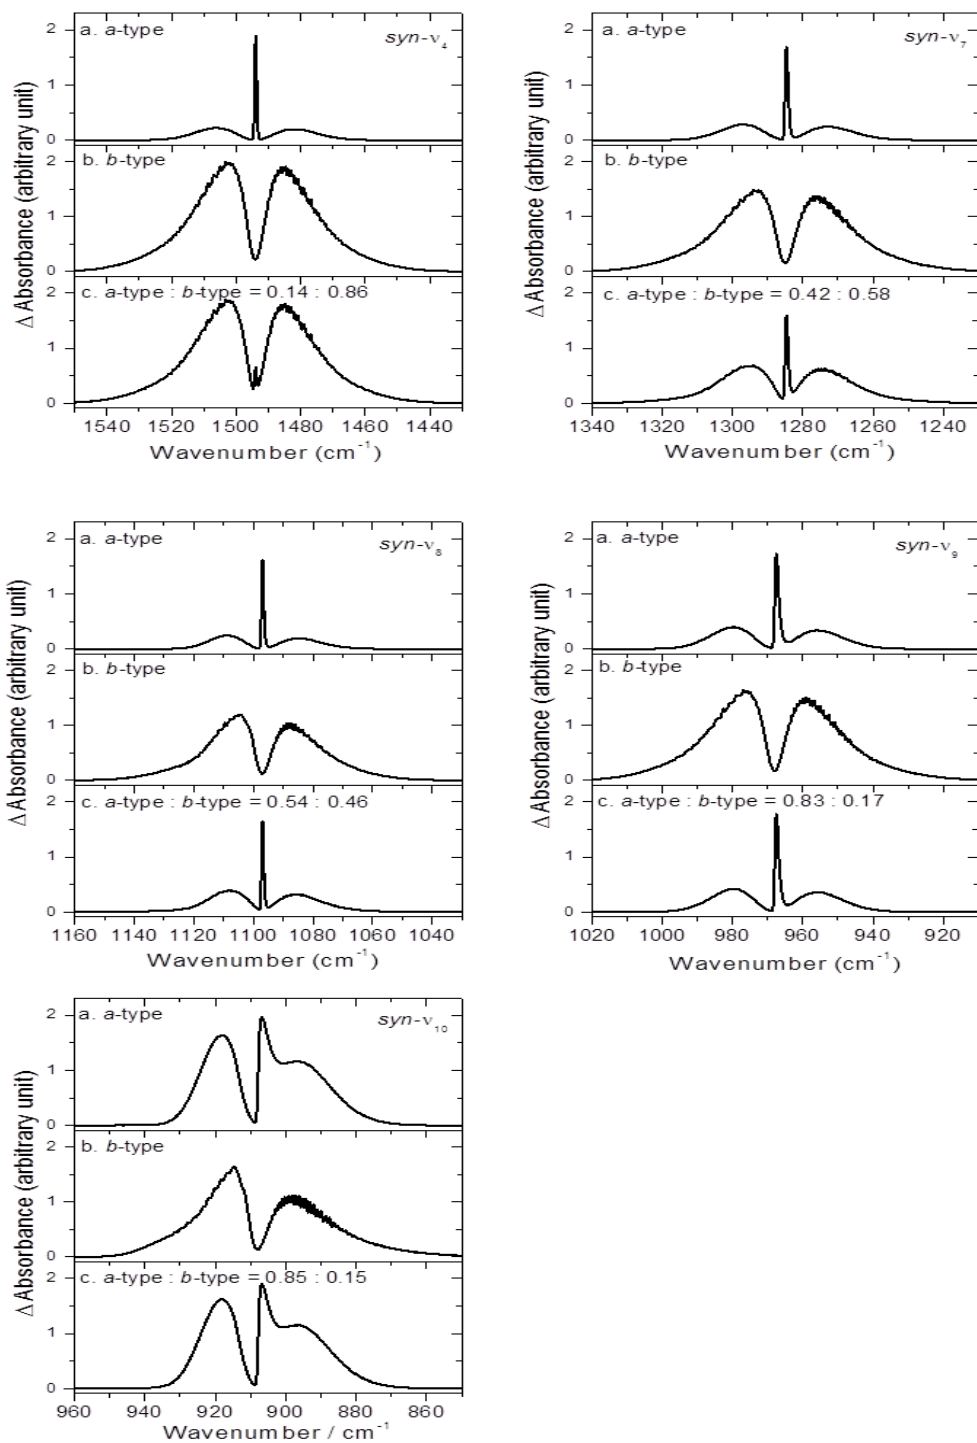

**Supplementary Figure 5 | Simulation of *a*-, *b*-type, and the resultant spectra for the  $\nu_4$  and  $\nu_7$ - $\nu_{10}$  modes of *syn*-CH<sub>3</sub>CHOO. Parameters are:  $J_{\max} = 170$ ,  $T = 328$  K, and Gaussian width =  $0.64$  cm<sup>-1</sup>; type ratios are listed in figures.**

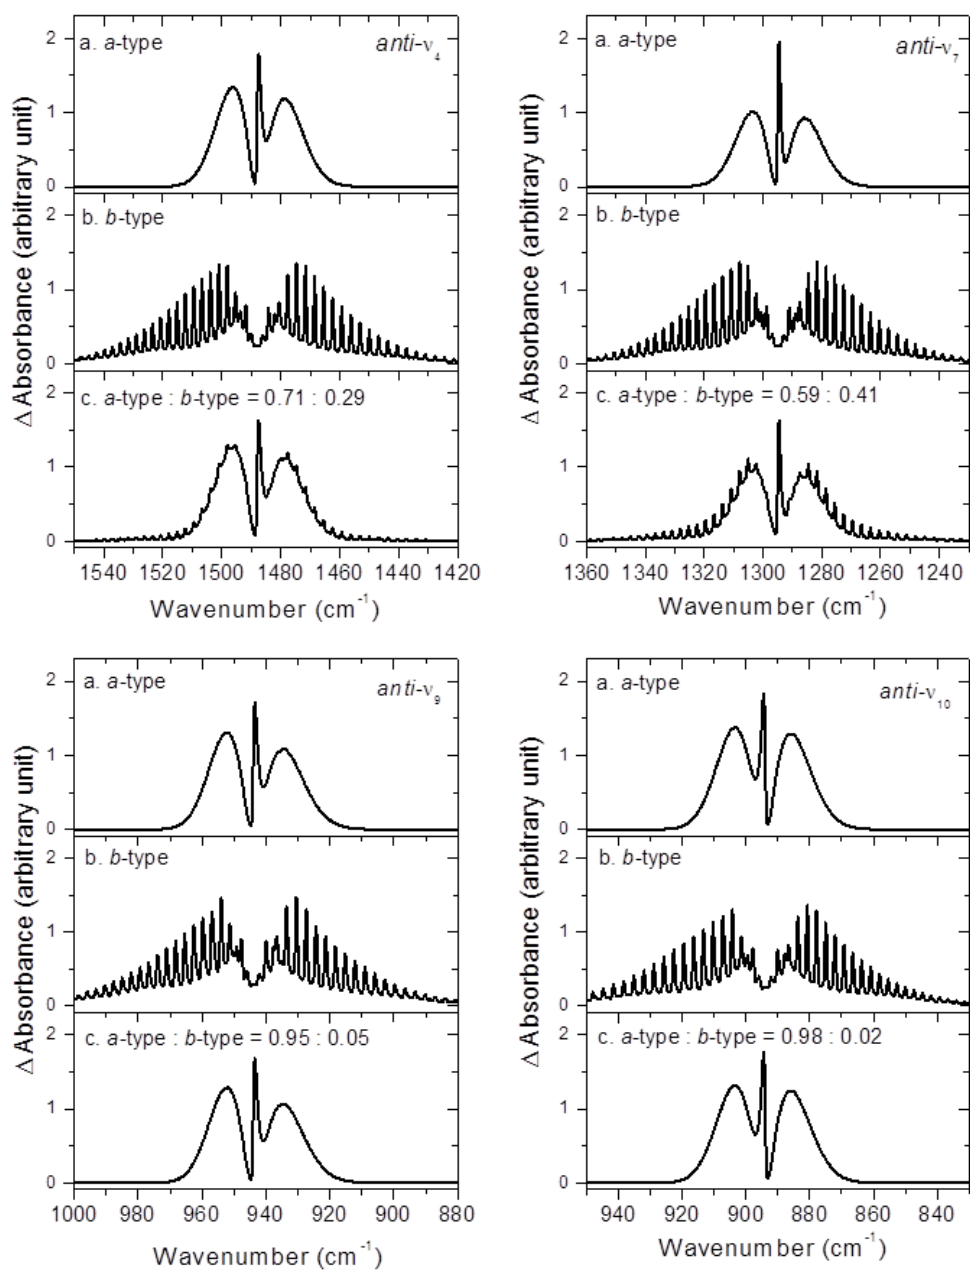

**Supplementary Figure 6 | Simulation of *a*-, *b*-type, and the resultant spectra for the  $\nu_4$ ,  $\nu_7$ ,  $\nu_9$  and  $\nu_{10}$  modes of *anti*-CH<sub>3</sub>CHO. Parameters are:  $J_{\max} = 170$ ,  $T = 328$  K, and Gaussian width =  $0.64$  cm<sup>-1</sup>; type ratios are listed in figures.**

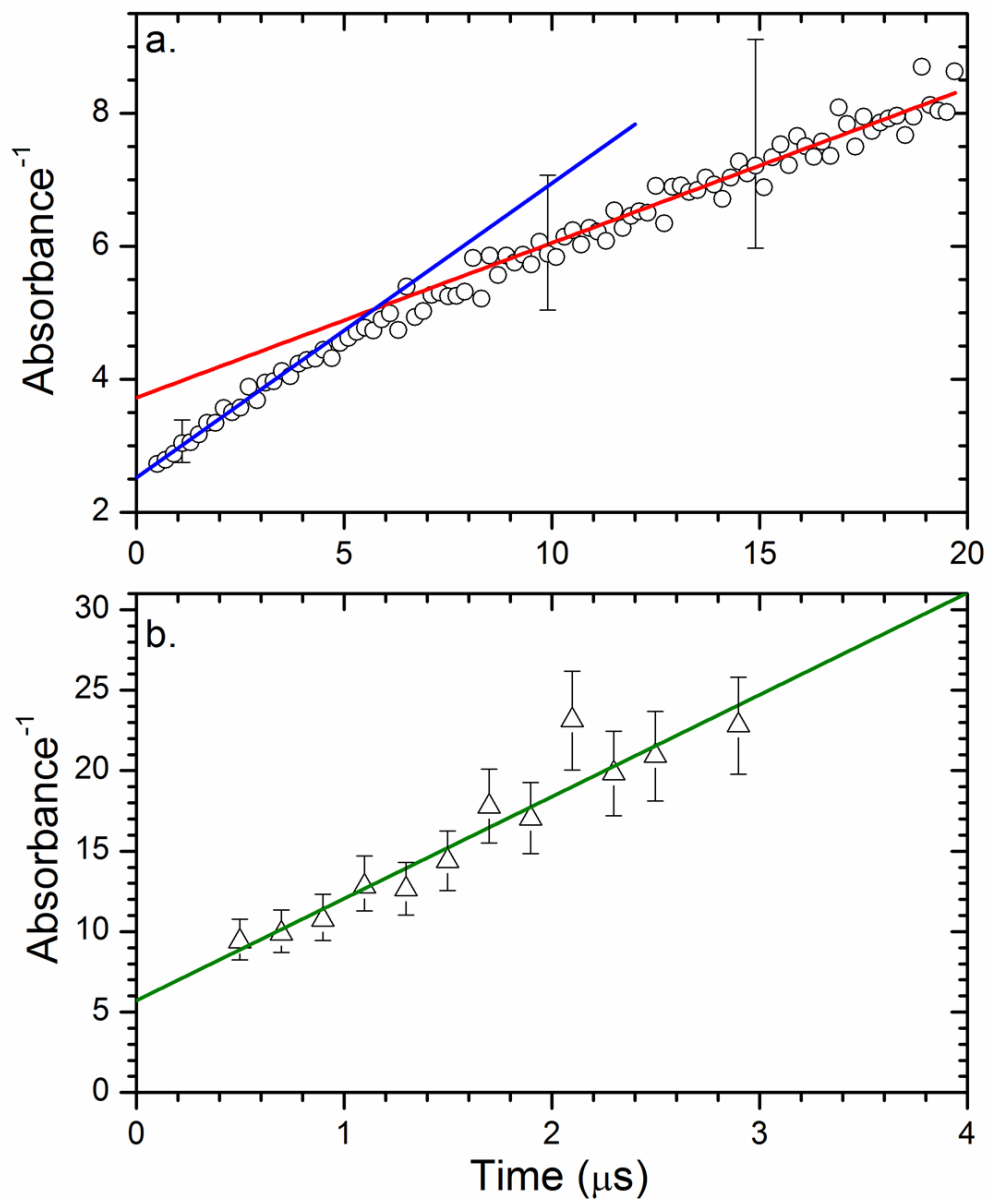

**Supplementary Figure 7 | Plot of the reciprocal integrated absorbance versus reaction time. a,** reciprocal integrated absorbance of band  $A_1$  versus reaction time  $t$ . Data for  $t \geq 12 \mu\text{s}$ , assumed to be mainly due to *syn*- $\text{CH}_3\text{CHOO}$ , are fitted with a line (red) with a slope  $0.23 \pm 0.02 \text{ cm } \mu\text{s}^{-1}$ , whereas data for  $t \leq 4 \mu\text{s}$  are fitted with a line (blue) with a slope  $0.44 \pm 0.02 \text{ cm } \mu\text{s}^{-1}$ . **b,** Reciprocal integrated absorbance of *anti*- $\text{CH}_3\text{CHOO}$  versus reaction time  $t$  estimated by assuming that *syn*- $\text{CH}_3\text{CHOO}$  dominates after  $10 \mu\text{s}$  and that the fitted (red) line in Fig. 5a represents  $\Gamma^{-1}$  for *syn*- $\text{CH}_3\text{CHOO}$ . Data are fitted with a line with a slope  $6.3 \pm 0.6 \text{ cm } \mu\text{s}^{-1}$ .

**Supplementary Table 1 | Comparison of anharmonic vibrational wavenumbers (cm<sup>-1</sup>) and IR intensities of vibrational modes of *syn*-CH<sub>3</sub>CHO predicted with various methods.**

| Mode            | Sym. | MP2<br>/aug-cc-pVDZ   | B3LYP<br>/aug-cc-pVTZ | NEVPT2(8,8)<br>/aug-cc-pVDZ | MULTIMODE<br>(18 modes) | Mode<br>description <sup>a</sup> |
|-----------------|------|-----------------------|-----------------------|-----------------------------|-------------------------|----------------------------------|
| v <sub>1</sub>  | A'   | 3114 (1) <sup>b</sup> | 3098 (4) <sup>b</sup> | 3119                        | 3103 (1) <sup>b</sup>   | CH str.                          |
| v <sub>2</sub>  | A'   | 3035 (2)              | 2996 (11)             | 3030                        | 3048 (0)                | CH/CH <sub>2</sub> oph-str.      |
| v <sub>3</sub>  | A'   | 2843 (0)              | 2891 (5)              | 2853                        |                         | CH <sub>3</sub> s-str.           |
| v <sub>4</sub>  | A'   | 1465 (6)              | 1538 (36)             | 1484                        | 1494 (8)                | CO str./HCO bend                 |
| v <sub>5</sub>  | A'   | 1422 (1)              | 1414 (11)             | 1437                        | 1431 (3)                | CH <sub>2</sub> scissor.         |
| v <sub>6</sub>  | A'   | 1341 (2)              | 1361 (18)             | 1353                        | 1371 (3)                | CH <sub>3</sub> umbrella         |
| v <sub>7</sub>  | A'   | 1241 (27)             | 1319 (12)             | 1291                        | 1285 (19)               | HCO bend/CO str.                 |
| v <sub>8</sub>  | A'   | 1106 (2)              | 1079 (25)             | 1112                        | 1097 (6)                | CH <sub>2</sub> wag/CCH bend.    |
| v <sub>9</sub>  | A'   | 980 (0)               | 962 (8)               | 972                         | 969 (5)                 | CCH bend/ CH <sub>2</sub> wag    |
| v <sub>10</sub> | A'   | 891 (100)             | 875 (100)             | 889                         | 908 (100)               | OO str.                          |
| v <sub>11</sub> | A'   | 695 (0)               | 665 (4)               | 668                         | 676 (1)                 | CCO/COO oph-bend                 |
| v <sub>12</sub> | A'   | 308 (1)               | 291 (11)              | 290                         | 314 (3) <sup>c</sup>    | CCO/COO iph-bend                 |
| v <sub>13</sub> | A''  | 2834 (0)              | 2897 (1)              | 2871                        | 2976 (0)                | CH <sub>2</sub> a-str.           |
| v <sub>14</sub> | A''  | 1405 (3)              | 1383 (14)             | 1427                        | 1408 (4)                | CH <sub>2</sub> twist.           |
| v <sub>15</sub> | A''  | 1000 (0)              | 1019 (0)              | 1011                        | 1008 (0)                | op-deform                        |
| v <sub>16</sub> | A''  | 697 (4)               | 740 (22)              | 684                         | 723 (7)                 | CH op-bend.                      |
| v <sub>17</sub> | A''  | 474 (0)               | 452 (0)               | 435                         | 449 (0)                 | op-deform                        |
| v <sub>18</sub> | A''  | 214 (0)               | 109 (4)               | 221                         | 208 (1) <sup>c</sup>    | CH <sub>3</sub> torsion          |

<sup>a</sup>Approximate mode description. *a*: asymmetric; *s*: symmetric; str.: stretch; iph: in-phase; oph: out-of-phase; ip: in-plane; op: out-of-plane.

<sup>b</sup>Percentage IR intensities relative to the most intense line; the IR intensities are 460, 83, and 44 km mol<sup>-1</sup> from MP2, B3LYP (harmonic) and MULTIMODE methods, respectively.

<sup>c</sup>Harmonic wavenumbers.



**Supplementary Table 2 | Comparison of anharmonic vibrational wavenumbers (cm<sup>-1</sup>) and IR intensities of vibrational modes of *anti*-CH<sub>3</sub>CHO predicted with various methods.**

| Mode            | Sym. | MP2                   | B3LYP                 | NEVPT2(8,8)  | MULTIMODE              | Mode description <sup>a</sup> |
|-----------------|------|-----------------------|-----------------------|--------------|------------------------|-------------------------------|
|                 |      | /aug-cc-pVDZ          | /aug-cc-pVTZ          | /aug-cc-pVDZ | (18 modes)             |                               |
| v <sub>1</sub>  | A'   | 3052 (0) <sup>b</sup> | 2990 (4) <sup>b</sup> | 3097         |                        | CH/CH oph-str.                |
| v <sub>2</sub>  | A'   | 3009 (1)              | 2966 (1)              | 3021         |                        | CH/CH iph-str.                |
| v <sub>3</sub>  | A'   | 2899 (2)              | 2919 (2)              | 2917         |                        | CH <sub>3</sub> s-str.        |
| v <sub>4</sub>  | A'   | 1483 (23)             | 1521 (1)              | 1500         | 1488 (10) <sup>b</sup> | CO str./CH ip-bend.           |
| v <sub>5</sub>  | A'   | 1434 (1)              | 1425 (11)             | 1453         | 1427 (0)               | CH <sub>2</sub> scissor.      |
| v <sub>6</sub>  | A'   | 1383 (5)              | 1395 (12)             | 1379         | 1390 (6)               | CH <sub>3</sub> umbrella      |
| v <sub>7</sub>  | A'   | 1310 (1)              | 1319 (12)             | 1296         | 1295 (3)               | CH ip-bend/CO str.            |
| v <sub>8</sub>  | A'   | 1143 (1)              | 1128 (3)              | 1155         | 1136 (1)               | CCH bend                      |
| v <sub>9</sub>  | A'   | 874 (100)             | 943 (100)             | 961          | 944 (100)              | OO str.                       |
| v <sub>10</sub> | A'   | 926 (35)              | 872 (20)              | 892          | 894 (49)               | OO str./CH <sub>2</sub> wag   |
| v <sub>11</sub> | A'   | 575 (0)               | 547 (7)               | 560          | 565 (2)                | CCO/COO iph-bend              |
| v <sub>12</sub> | A'   | 323 (6)               | 322 (8)               | 340          | 330 (7)                | CCO/COO oph-bend              |
| v <sub>13</sub> | A''  | 2885 (0)              | 2914 (2)              | 2895         |                        | CH <sub>2</sub> a-str.        |
| v <sub>14</sub> | A''  | 1441 (2)              | 1423 (9)              | 1456         | 1446 (3)               | CH <sub>3</sub> deform        |
| v <sub>15</sub> | A''  | 1043 (0)              | 1047 (0)              | 1043         | 1034 (0)               | op- deform                    |
| v <sub>16</sub> | A''  | 845 (1)               | 850 (7)               | 822          | 840 (3)                | CH op-bend                    |
| v <sub>17</sub> | A''  | 308 (0)               | 249 (0)               | 378          | 255 (0) <sup>c</sup>   | op-deform                     |
| v <sub>18</sub> | A''  | 290 (0)               | 140 (1)               | 241          | 156 (0) <sup>c</sup>   | CH <sub>3</sub> torsion       |

<sup>a</sup>Approximate mode description. *a*: asymmetric; *s*: symmetric; str.: stretch; iph: in-phase; oph: out-of-phase; ip: in-plane; op: out-of-plane.

<sup>b</sup>Percentage IR intensities relative to the most intense line; the IR intensities are 410, 121 and 44 km mol<sup>-1</sup> from MP2, B3LYP (harmonic) and MULTIMODE methods, respectively.

<sup>c</sup>Harmonic wavenumbers

**Supplementary Table 3 | Comparison of anharmonic vibrational wavenumbers (cm<sup>-1</sup>) and IR intensities of vibrational modes of methyl dioxirane predicted with various methods.**

| Mode            | B3LYP <sup>a</sup>     | MP2 <sup>b</sup>       | NEVPT2(8,8) <sup>b</sup> |
|-----------------|------------------------|------------------------|--------------------------|
| v <sub>1</sub>  | 2994 (17) <sup>c</sup> | 3019 (16) <sup>c</sup> | 3050                     |
| v <sub>2</sub>  | 2947 (46)              | 2967 (50)              | 2968                     |
| v <sub>3</sub>  | 2949 (8)               | 2954 (10)              | 2968                     |
| v <sub>4</sub>  | 1453 (24)              | 1460 (27)              | 1471                     |
| v <sub>5</sub>  | 1408 (100)             | 1420 (100)             | 1438                     |
| v <sub>6</sub>  | 1370 (6)               | 1361 (7)               | 1374                     |
| v <sub>7</sub>  | 1272 (73)              | 1261 (63)              | 1261                     |
| v <sub>8</sub>  | 1112 (24)              | 1127 (20)              | 1135                     |
| v <sub>9</sub>  | 923 (2)                | 921 (0.5)              | 920                      |
| v <sub>10</sub> | 774 (3)                | 730 (2)                | 684                      |
| v <sub>11</sub> | 457 (19)               | 463 (23)               | 468                      |
| v <sub>12</sub> | 2956 (16)              | 2944 (15)              | 3061                     |
| v <sub>13</sub> | 1445 (11)              | 1450 (10)              | 1460                     |
| v <sub>14</sub> | 1182 (0.0)             | 1197 (3)               | 1198                     |
| v <sub>15</sub> | 1009 (14)              | 1021 (23)              | 1026                     |
| v <sub>16</sub> | 814 (22)               | 874 (27)               | 833                      |
| v <sub>17</sub> | 383 (0.0)              | 394 (0.0)              | 397                      |
| v <sub>18</sub> | 211 (0.3)              | 299 (0.4)              | 301                      |

<sup>a</sup>With basis set aug-cc-pVTZ.

<sup>b</sup>With basis set aug-cc-pVDZ.

<sup>c</sup>Percentage IR intensities relative to the most intense line; the IR intensities are 63 and 55 km mol<sup>-1</sup> from the B3LYP (harmonic) and MP2 methods, respectively.

**Supplementary Table 4 | Comparison of relative energy, anharmonic vibrational wavenumbers (cm<sup>-1</sup>) and IR intensities of vibrational modes of *trans*- and *cis*-vinyl hydroperoxide (C<sub>2</sub>H<sub>3</sub>OOH) predicted with various methods.**

| Mode                             | <i>trans</i> -C <sub>2</sub> H <sub>3</sub> OOH |                        |                          | <i>cis</i> -C <sub>2</sub> H <sub>3</sub> OOH |                        |                          |
|----------------------------------|-------------------------------------------------|------------------------|--------------------------|-----------------------------------------------|------------------------|--------------------------|
|                                  | B3LYP <sup>a</sup>                              | MP2 <sup>b</sup>       | NEVPT2(8,8) <sup>b</sup> | B3LYP <sup>a</sup>                            | MP2 <sup>b</sup>       | NEVPT2(8,8) <sup>b</sup> |
| v <sub>1</sub>                   | 3552 (57) <sup>c</sup>                          | 3484 (34) <sup>c</sup> | 3438                     | 3564 (40) <sup>d</sup>                        | 3461 (40) <sup>d</sup> | 3395                     |
| v <sub>2</sub>                   | 3115 (2)                                        | 3118 (1)               | 3122                     | 3123 (1)                                      | 3131 (0.5)             | 3141                     |
| v <sub>3</sub>                   | 3048 (3)                                        | 3057 (4)               | 3122                     | 3040 (1)                                      | 3075 (1)               | 3080                     |
| v <sub>4</sub>                   | 3065 (1)                                        | 3070 (1)               | 3076                     | 3000 (0.2)                                    | 3077 (0.1)             | 3089                     |
| v <sub>5</sub>                   | 1643 (75)                                       | 1631 (66)              | 1644                     | 1641 (100)                                    | 1648 (98)              | 1662                     |
| v <sub>6</sub>                   | 1392 (5)                                        | 1384 (3)               | 1391                     | 1409 (14)                                     | 1389 (10)              | 1403                     |
| v <sub>7</sub>                   | 1341 (86)                                       | 1331 (48)              | 1354                     | 1330 (26)                                     | 1299 (41)              | 1298                     |
| v <sub>8</sub>                   | 1299 (1)                                        | 1281 (2)               | 1288                     | 1304 (2)                                      | 1288 (2)               | 1300                     |
| v <sub>9</sub>                   | 1150 (44)                                       | 1156 (43)              | 1157                     | 1134 (29)                                     | 1119 (36)              | 1133                     |
| v <sub>10</sub>                  | 967 (15)                                        | 970 (37)               | 987                      | 941 (13)                                      | 949 (19)               | 986                      |
| v <sub>11</sub>                  | 947 (14)                                        | 942 (13)               | 936                      | 940 (17)                                      | 960 (29)               | 951                      |
| v <sub>12</sub>                  | 865 (43)                                        | 880 (38)               | 919                      | 866 (22)                                      | 820 (16)               | 890                      |
| v <sub>13</sub>                  | 851 (24)                                        | 816 (13)               | 799                      | 833 (43)                                      | 857 (41)               | 808                      |
| v <sub>14</sub>                  | 691 (6)                                         | 732 (6)                | 745                      | 697 (4)                                       | 726 (4)                | 744                      |
| v <sub>15</sub>                  | 522 (5)                                         | 514 (11)               | 504                      | 608 (4)                                       | 611 (4)                | 610                      |
| v <sub>16</sub>                  | 343 (4)                                         | 367 (2)                | 372                      | 309 (0.4)                                     | 330 (1)                | 325                      |
| v <sub>17</sub>                  | 211 (100) <sup>e</sup>                          | 579 (100)              | 576                      | 232 (4)                                       | 276 (5)                | 256                      |
| v <sub>18</sub>                  | 85 (2)                                          | 143 (15)               | 140                      | 156 (88) <sup>e</sup>                         | 702 (100)              | 686                      |
| Energy<br>/ kJ mol <sup>-1</sup> | 3.18                                            | 2.96                   |                          | 0                                             | 0                      |                          |

<sup>a</sup>With basis set aug-cc-pVTZ. <sup>b</sup>With basis set aug-cc-pVDZ. <sup>c</sup>Percentage IR intensities relative to the most intense line; the IR intensities are 118 and 105 km mol<sup>-1</sup> from B3LYP (harmonic) and MP2 methods, respectively. <sup>d</sup>Percentage IR intensities relative to the most intense line; the IR intensities are 138 and 117 km mol<sup>-1</sup> from B3LYP (harmonic) and MP2 methods, respectively. <sup>e</sup>Harmonic wavenumbers; VPT2 technique fails to produce anharmonic wavenumber for this mode.

**Supplementary Table 5 | Comparison of relative energy, anharmonic vibrational wavenumbers (cm<sup>-1</sup>) and IR intensities of vibrational modes of *syn*-CH<sub>3</sub>CHIOO and *anti*-CH<sub>3</sub>CHIOO predicted with various methods.**

| Mode                             | <i>syn</i> -CH <sub>3</sub> CHIOO |                          | <i>anti</i> -CH <sub>3</sub> CHIOO |                          |
|----------------------------------|-----------------------------------|--------------------------|------------------------------------|--------------------------|
|                                  | B3LYP <sup>a</sup>                | NEVPT2(1,1) <sup>b</sup> | B3LYP <sup>a</sup>                 | NEVPT2(1,1) <sup>b</sup> |
| v <sub>1</sub>                   | 3013 (3) <sup>c</sup>             | 3000                     | 3015 (2) <sup>c</sup>              | 3005                     |
| v <sub>2</sub>                   | 2994 (5)                          | 3029                     | 3002 (1)                           | 2991                     |
| v <sub>3</sub>                   | 2971 (10)                         | 2972                     | 2979 (12)                          | 3016                     |
| v <sub>4</sub>                   | 2939 (23)                         | 3162                     | 2934 (24)                          | 2941                     |
| v <sub>5</sub>                   | 1451 (13)                         | 1458                     | 1441 (10)                          | 1464                     |
| v <sub>6</sub>                   | 1441 (20)                         | 1453                     | 1434 (20)                          | 1452                     |
| v <sub>7</sub>                   | 1384 (28)                         | 1375                     | 1379 (32)                          | 1372                     |
| v <sub>8</sub>                   | 1300 (20)                         | 1294                     | 1334 (5)                           | 1329                     |
| v <sub>9</sub>                   | 1193 (95)                         | 1220                     | 1201 (98)                          | 1226                     |
| v <sub>10</sub>                  | 1147 (55)                         | 1144                     | 1105 (29)                          | 1117                     |
| v <sub>11</sub>                  | 1082 (100)                        | 1114                     | 1083 (78)                          | 1094                     |
| v <sub>12</sub>                  | 1046 (73)                         | 1063                     | 1042 (59)                          | 1059                     |
| v <sub>13</sub>                  | 963 (23)                          | 988                      | 958 (24)                           | 985                      |
| v <sub>14</sub>                  | 806 (68)                          | 840                      | 767 (100)                          | 814                      |
| v <sub>15</sub>                  | 550 (83)                          | 578                      | 626 (5)                            | 648                      |
| v <sub>16</sub>                  | 478 (50)                          | 517                      | 493 (98)                           | 533                      |
| v <sub>17</sub>                  | 349 (3)                           | 364                      | 321 (12)                           | 340                      |
| v <sub>18</sub>                  | 249 (5)                           | 278                      | 255 (2)                            | 319                      |
| v <sub>19</sub>                  | 235 (3)                           | 294                      | 236 (2)                            | 316                      |
| v <sub>20</sub>                  | 216 (1)                           | 634                      | 222 (0.2)                          | 152                      |
| v <sub>21</sub>                  | 65 (3)                            | 95                       | 75 (1)                             | 111                      |
| Energy<br>/ kJ mol <sup>-1</sup> | 0                                 | 0                        | 3.14                               | 0.40                     |

<sup>a</sup>With basis set aug-cc-pVTZ-pp

<sup>b</sup>With basis set aug-cc-pVDZ.

<sup>c</sup> Percentage IR intensities (harmonic) relative to the most intense line; the IR intensities of *syn*- and *anti*-CH<sub>3</sub>CHIOO are 40 and 41 km mol<sup>-1</sup>, respectively.

**Supplementary Table 6 | Comparison of fitted wavenumbers (cm<sup>-1</sup>) and relative intensities of various vibrational modes of *syn*-CH<sub>3</sub>CHOO and *anti*-CH<sub>3</sub>CHOO with MULTIMODE predictions.**

| Transition                                                | Intensity | Energy | Expt. | Caln 1 <sup>a</sup> | Caln2 <sup>b</sup> | Transition                                               | Intensity | Energy | Expt.  | Caln1 <sup>a, c</sup> |
|-----------------------------------------------------------|-----------|--------|-------|---------------------|--------------------|----------------------------------------------------------|-----------|--------|--------|-----------------------|
| Band A <sub>1</sub>                                       |           |        |       |                     |                    | Band A <sub>3</sub>                                      |           |        |        |                       |
| <i>syn</i> -CH <sub>3</sub> CHOO                          |           |        |       |                     |                    | <i>syn</i> -CH <sub>3</sub> CHOO                         |           |        |        |                       |
| 10 <sub>0</sub> <sup>1</sup>                              | 1.00      |        | 871.2 | 911.9               | 908.1              | 7 <sub>0</sub> <sup>1</sup>                              | 1.00      |        | 1280.8 | 1287.0                |
| 10 <sub>0</sub> <sup>1</sup> 18 <sub>1</sub> <sup>1</sup> | 0.43      | 193    | +2.4  | +5.0                | +13.6              | 7 <sub>0</sub> <sup>1</sup> 18 <sub>1</sub> <sup>1</sup> | 0.42      | 198    | +3.7   | +7.8                  |
| 10 <sub>0</sub> <sup>1</sup> 18 <sub>2</sub> <sup>2</sup> | 0.25      | 316    | +6.3  | +12.0               | +29.4              | 7 <sub>0</sub> <sup>1</sup> 18 <sub>2</sub> <sup>2</sup> | 0.18      | 391    | +8.2   | +17.2                 |
| 10 <sub>0</sub> <sup>1</sup> 18 <sub>3</sub> <sup>3</sup> | 0.10      | 525    | +11.8 |                     |                    | 7 <sub>0</sub> <sup>1</sup> 18 <sub>3</sub> <sup>3</sup> | 0.07      | 597    | +12.7  |                       |
| 10 <sub>0</sub> <sup>1</sup> 12 <sub>1</sub> <sup>1</sup> | 0.29      | 282    | +10.1 | +12.0               | +28.3              | 7 <sub>0</sub> <sup>1</sup> 12 <sub>1</sub> <sup>1</sup> | 0.29      | 282    | +2.2   |                       |
| 10 <sub>0</sub> <sup>1</sup> 12 <sub>2</sub> <sup>2</sup> | 0.15      | 433    | +15.8 | +11.1               | +80.8              | 7 <sub>0</sub> <sup>1</sup> 12 <sub>2</sub> <sup>2</sup> | 0.15      | 433    | +5.7   |                       |
| <i>anti</i> -CH <sub>3</sub> CHOO                         |           |        |       |                     |                    | <i>anti</i> -CH <sub>3</sub> CHOO                        |           |        |        |                       |
| 9 <sub>0</sub> <sup>1</sup>                               | 1.00      |        | 883.7 | 954.6               | 944.2              | 7 <sub>0</sub> <sup>1</sup>                              | 1.00      |        | 1279.4 | 1299.8                |
| 9 <sub>0</sub> <sup>1</sup> 18 <sub>1</sub> <sup>1</sup>  | 0.52      | 149    | +1.8  | +18.1               | +21.7              | 7 <sub>0</sub> <sup>1</sup> 18 <sub>1</sub> <sup>1</sup> | 0.50      | 158    | +2.6   | +17.2                 |
| 9 <sub>0</sub> <sup>1</sup> 18 <sub>2</sub> <sup>2</sup>  | 0.29      | 282    | +5.3  | +27.7               | +45.1              | 7 <sub>0</sub> <sup>1</sup> 18 <sub>2</sub> <sup>2</sup> | 0.25      | 316    | +5.6   | +22.0                 |
| 9 <sub>0</sub> <sup>1</sup> 17 <sub>1</sub> <sup>1</sup>  | 0.35      | 239    | +2.3  | +8.6                | +20.4              | Band A <sub>4</sub>                                      |           |        |        |                       |
| 9 <sub>0</sub> <sup>1</sup> 17 <sub>2</sub> <sup>2</sup>  | 0.15      | 433    | +6.3  |                     |                    | <i>syn</i> -CH <sub>3</sub> CHOO                         |           |        |        |                       |
| <i>anti</i> -CH <sub>3</sub> CHOO                         |           |        |       |                     |                    | <i>syn</i> -CH <sub>3</sub> CHOO                         |           |        |        |                       |
| 10 <sub>0</sub> <sup>1</sup>                              | 1.00      |        | 851.8 | 902.7               | 894.2              | 4 <sub>0</sub> <sup>1</sup>                              | 1.00      |        | 1476.8 | 1495.9                |
| 10 <sub>0</sub> <sup>1</sup> 18 <sub>1</sub> <sup>1</sup> | 0.50      | 158    | +9.2  | +16.9               | +22.8              | 4 <sub>0</sub> <sup>1</sup> 18 <sub>1</sub> <sup>1</sup> | 0.42      | 198    | +2.2   | +6.8                  |
| 10 <sub>0</sub> <sup>1</sup> 18 <sub>2</sub> <sup>2</sup> | 0.25      | 316    | +15.2 | +27.6               | +47.1              | 4 <sub>0</sub> <sup>1</sup> 18 <sub>2</sub> <sup>2</sup> | 0.18      | 391    | +4.2   | +12.6                 |
| 10 <sub>0</sub> <sup>1</sup> 17 <sub>1</sub> <sup>1</sup> | 0.35      | 239    | +11.2 | +8.7                | +25.3              | 4 <sub>0</sub> <sup>1</sup> 18 <sub>3</sub> <sup>3</sup> | 0.07      | 597    | +6.2   |                       |
| 10 <sub>0</sub> <sup>1</sup> 17 <sub>2</sub> <sup>2</sup> | 0.15      | 433    | +20.2 |                     | +61.7              | 4 <sub>0</sub> <sup>1</sup> 12 <sub>1</sub> <sup>1</sup> | 0.29      | 282    | +0.2   |                       |
|                                                           |           |        |       |                     |                    | <i>anti</i> -CH <sub>3</sub> CHOO                        |           |        |        |                       |
|                                                           |           |        |       |                     |                    | 4 <sub>0</sub> <sup>1</sup> 12 <sub>2</sub> <sup>2</sup> |           |        |        |                       |
|                                                           |           |        |       |                     |                    | 4 <sub>0</sub> <sup>1</sup>                              |           |        |        |                       |
|                                                           |           |        |       |                     |                    | 1.00                                                     |           |        |        |                       |
|                                                           |           |        |       |                     |                    | 1479.0                                                   |           |        |        |                       |
|                                                           |           |        |       |                     |                    | 1498.2                                                   |           |        |        |                       |
|                                                           |           |        |       |                     |                    | 4 <sub>0</sub> <sup>1</sup> 18 <sub>1</sub> <sup>1</sup> |           |        |        |                       |
|                                                           |           |        |       |                     |                    | 0.50                                                     |           |        |        |                       |
|                                                           |           |        |       |                     |                    | 158                                                      |           |        |        |                       |
|                                                           |           |        |       |                     |                    | +1.0                                                     |           |        |        |                       |
|                                                           |           |        |       |                     |                    | +14.1                                                    |           |        |        |                       |
|                                                           |           |        |       |                     |                    | 4 <sub>0</sub> <sup>1</sup> 18 <sub>2</sub> <sup>2</sup> |           |        |        |                       |
|                                                           |           |        |       |                     |                    | 0.25                                                     |           |        |        |                       |
|                                                           |           |        |       |                     |                    | 316                                                      |           |        |        |                       |
|                                                           |           |        |       |                     |                    | +2.0                                                     |           |        |        |                       |

<sup>a</sup>MULTIMODE calculations coupling 15 modes of *syn*-CH<sub>3</sub>CHOO or 16 modes of *anti*-CH<sub>3</sub>CHOO, which includes 13 modes of *syn* (14 modes for *anti*) as discussed in the text and another two lowest frequency modes. The maximal excitations of two lowest energy modes are limited to 2.

<sup>b</sup>Calculations coupling all 18 modes of *syn*-CH<sub>3</sub>CHOO or *anti*-CH<sub>3</sub>CHOO.

<sup>c</sup>Hot band results are problematic, see text for discussion.

**Supplementary Table 7 | Comparison of rotational parameters of *syn*-CH<sub>3</sub>CHOO in their ground and vibrationally excited states predicted with various methods.**

|                    | MP2    |        |        | B3LYP  |        |        | MULTIMODE <sup>a</sup>          |                    |                    |
|--------------------|--------|--------|--------|--------|--------|--------|---------------------------------|--------------------|--------------------|
|                    | A'/A'' | B'/B'' | C'/C'' | A'/A'' | B'/B'' | C'/C'' | A'/A''                          | B'/B''             | C'/C''             |
| v <sub>4</sub>     | 0.9989 | 0.9984 | 0.9985 | 0.9966 | 0.9986 | 0.9978 | 0.9973<br>(0.9998) <sup>b</sup> | 0.9981<br>(0.9985) | 0.9980<br>(0.9992) |
| v <sub>7</sub>     | 0.9979 | 1.0023 | 1.0010 | 1.0001 | 1.0012 | 1.0008 | 0.9982<br>(0.9985)              | 0.9981<br>(0.9983) | 0.9980<br>(0.9989) |
| v <sub>8</sub>     | 1.0008 | 1.0001 | 0.9986 | 1.0065 | 0.9994 | 0.9986 | 1.0011<br>(1.0003)              | 1.0006<br>(0.9977) | 0.9980<br>(0.9946) |
| v <sub>9</sub>     | 0.9993 | 0.9961 | 0.9975 | 0.9994 | 0.9968 | 0.9975 | 0.9966<br>(0.9967)              | 0.9992<br>(0.9990) | 0.9989<br>(0.9992) |
| v <sub>10</sub>    | 0.9922 | 1.0002 | 0.9967 | 0.9914 | 1.0005 | 0.9967 | 0.9904<br>(0.9856)              | 0.9990<br>(0.9985) | 0.9946<br>(0.9946) |
|                    | A''    | B''    | C''    | A''    | B''    | C''    | A''                             | B''                | C''                |
| v = 0              | 0.6015 | 0.2393 | 0.1764 | 0.5876 | 0.2333 | 0.1719 | 0.5810                          | 0.2388             | 0.1748             |
| Expt. <sup>c</sup> | 0.5866 | 0.2379 | 0.1744 | 0.5866 | 0.2379 | 0.1744 | 0.5866                          | 0.2379             | 0.1744             |

<sup>a</sup> MULTIMODE calculation coupling 13 modes of *syn*-CH<sub>3</sub>CHOO, see text for details.

<sup>b</sup> Ratios used in the simulation for the best fit are listed in parentheses.

<sup>c</sup> From reference<sup>24</sup>.

**Supplementary Table 8 | Comparison of rotational parameters of *anti*-CH<sub>3</sub>CHOO in their ground and vibrationally excited states predicted with various methods.**

|                    | MP2    |        |        | B3LYP  |        |        | MULTIMODE <sup>a</sup>          |                    |                    |
|--------------------|--------|--------|--------|--------|--------|--------|---------------------------------|--------------------|--------------------|
|                    | A'/A'' | B'/B'' | C'/C'' | A'/A'' | B'/B'' | C'/C'' | A'/A''                          | B'/B''             | C'/C''             |
| v <sub>4</sub>     | 1.0000 | 0.9993 | 0.9991 | 0.9837 | 0.9991 | 0.9977 | 0.9966<br>(0.9954) <sup>b</sup> | 1.0000<br>(1.0000) | 0.9993<br>(0.9986) |
| v <sub>7</sub>     | 1.0003 | 1.0005 | 1.0000 | 1.0021 | 1.0002 | 0.9997 | 0.9978<br>(0.9974)              | 1.0000<br>(1.0000) | 1.0000<br>(0.9993) |
| v <sub>8</sub>     | 1.0067 | 0.9990 | 0.9979 | 0.9987 | 0.9992 | 0.9977 | 1.0051<br>(1.0050)              | 0.9997<br>(0.9993) | 0.9982<br>(0.9978) |
| v <sub>9</sub>     | 1.0039 | 0.9996 | 0.9987 | 0.9891 | 0.9979 | 0.9963 | 0.9950<br>(0.9959)              | 0.9990<br>(0.9987) | 0.9982<br>(0.9978) |
| v <sub>10</sub>    | 1.0038 | 0.9958 | 0.9941 | 1.0087 | 0.9987 | 0.9965 | 1.0049<br>(1.0051)              | 0.9997<br>(0.9993) | 0.9982<br>(0.9986) |
|                    | A''    | B''    | C''    | A''    | B''    | C''    | A''                             | B''                | C''                |
| v = 0              | 1.6336 | 0.1491 | 0.1402 | 1.6272 | 0.1472 | 0.1380 | 1.5998                          | 0.1482             | 0.1392             |
| Expt. <sup>c</sup> | 1.6176 | 0.1479 | 0.1390 | 1.6176 | 0.1479 | 0.1390 | 1.6176                          | 0.1479             | 0.1390             |

<sup>a</sup> MULTIMODE calculation coupling 13 modes of *syn*-CH<sub>3</sub>CHOO, see text for details.

<sup>b</sup> Ratios used in the simulation for the best fit are listed in parentheses.

<sup>c</sup> From reference 24.

**Supplementary Table 9 | The comparison of energies ( $\text{cm}^{-1}$ ) and harmonic vibrational wavenumbers ( $\text{cm}^{-1}$ ) of *syn*-CH<sub>3</sub>CHO between the fitted PES and direct *ab initio* calculations. SP refers to the torsion saddle point.**

|                 | Minimum          |        | SP               |        |
|-----------------|------------------|--------|------------------|--------|
|                 | <i>ab initio</i> | PES    | <i>ab initio</i> | PES    |
| Energies        | 0.00             | 0.00   | 730.3            | 730.4  |
| Mode            |                  |        |                  |        |
| v <sub>1</sub>  | 3204.2           | 3206.0 | 3194.8           | 3196.8 |
| v <sub>2</sub>  | 3161.2           | 3161.2 | 3177.2           | 3176.7 |
| v <sub>3</sub>  | 3029.5           | 3030.5 | 3040.7           | 3036.7 |
| v <sub>4</sub>  | 1527.4           | 1528.3 | 1539.7           | 1538.4 |
| v <sub>5</sub>  | 1466.5           | 1468.0 | 1487.7           | 1484.6 |
| v <sub>6</sub>  | 1397.7           | 1396.0 | 1388.8           | 1389.2 |
| v <sub>7</sub>  | 1316.6           | 1317.9 | 1328.9           | 1329.2 |
| v <sub>8</sub>  | 1115.4           | 1115.8 | 1157.8           | 1156.4 |
| v <sub>9</sub>  | 977.6            | 977.5  | 929.8            | 933.2  |
| v <sub>10</sub> | 922.1            | 922.7  | 883.0            | 875.4  |
| v <sub>11</sub> | 677.6            | 677.8  | 653.3            | 648.0  |
| v <sub>12</sub> | 308.0            | 307.5  | 335.9            | 332.7  |
| v <sub>13</sub> | 3084.7           | 3085.3 | 3103.7           | 3105.8 |
| v <sub>14</sub> | 1449.2           | 1449.9 | 1449.8           | 1446.0 |
| v <sub>15</sub> | 1031.3           | 1034.0 | 1037.7           | 1046.2 |
| v <sub>16</sub> | 720.6            | 721.0  | 757.7            | 752.4  |
| v <sub>17</sub> | 447.7            | 448.3  | 430.8            | 435.1  |
| v <sub>18</sub> | 201.8            | 206.0  | 175.9i           | 177.1i |



**Supplementary Table 10 | The comparison of energies (relative to *syn*-CH<sub>3</sub>CHOO) and harmonic vibrational wavenumbers (cm<sup>-1</sup>) of *anti*-CH<sub>3</sub>CHOO between PES and *ab initio* calculation. SP refers to the torsion saddle point.**

|                 | Minimum          |        | SP               |        |
|-----------------|------------------|--------|------------------|--------|
|                 | <i>ab initio</i> | PES    | <i>ab initio</i> | PES    |
| Energies        | 1274.2           | 1274.2 | 1700.9           | 1700.9 |
| Mode            |                  |        |                  |        |
| v <sub>1</sub>  | 3168.3           | 3168.6 | 3171.2           | 3167.6 |
| v <sub>2</sub>  | 3154.0           | 3153.6 | 3152.4           | 3156.1 |
| v <sub>3</sub>  | 3039.2           | 3039.3 | 3047.0           | 3056.1 |
| v <sub>4</sub>  | 1533.8           | 1534.6 | 1507.2           | 1515.8 |
| v <sub>5</sub>  | 1466.0           | 1466.5 | 1483.8           | 1485.5 |
| v <sub>6</sub>  | 1419.8           | 1419.8 | 1414.7           | 1408.7 |
| v <sub>7</sub>  | 1321.3           | 1321.5 | 1318.1           | 1312.4 |
| v <sub>8</sub>  | 1159.2           | 1159.4 | 1147.9           | 1142.3 |
| v <sub>9</sub>  | 956.0            | 957.0  | 1002.1           | 1003.0 |
| v <sub>10</sub> | 904.6            | 904.9  | 890.6            | 890.9  |
| v <sub>11</sub> | 560.4            | 560.4  | 558.9            | 556.8  |
| v <sub>12</sub> | 324.5            | 324.3  | 325.1            | 326.1  |
| v <sub>13</sub> | 3103.6           | 3103.4 | 3115.6           | 3111.6 |
| v <sub>14</sub> | 1476.8           | 1477.1 | 1470.2           | 1469.0 |
| v <sub>15</sub> | 1053.7           | 1054.2 | 1053.2           | 1064.7 |
| v <sub>16</sub> | 850.2            | 848.3  | 822.7            | 819.8  |
| v <sub>17</sub> | 251.0            | 251.3  | 242.1            | 242.6  |
| v <sub>18</sub> | 156.2            | 155.7  | 171.1i           | 171.3i |

## Supplementary Methods

**Spectral simulation.** With the PGopher program,<sup>1</sup> we simulated the spectrum of each band using experimental rotational parameters  $A''$ ,  $B''$ , and  $C''$  reported by Nakajima and Endo,<sup>2</sup> ratios of rotational parameters  $A'/A''$ ,  $B'/B''$ , and  $C'/C''$  and  $a$ -type/ $b$ -type ratios of each mode predicted with the MULTIMODE method, as listed in Table S7 and S8,  $J_{\max} = 170$ ,  $T = 328$  K, and a Gaussian width  $0.64 \text{ cm}^{-1}$ . For an improved fitting, the ratios of  $A'/A''$ ,  $B'/B''$ , and  $C'/C''$  were changed slightly from the theoretical values, as shown in parentheses in Supplementary Tables 7 and 8. Simulated  $a$ - and  $b$ -type spectra for  $\nu_4$  and  $\nu_7$ – $\nu_{10}$  of *syn*-CH<sub>3</sub>CHOO and  $\nu_4$ ,  $\nu_7$ ,  $\nu_9$ , and  $\nu_{10}$  of *anti*-CH<sub>3</sub>CHOO are shown in Supplementary Figs 5 and 6. The projections of the dipole derivatives for each vibrational mode of CH<sub>3</sub>CHOO onto rotational axes  $a$ ,  $b$  and  $c$  determine the weighting of bands of types  $a$ ,  $b$ , and  $c$  in each vibrational absorption band. The position of each band was varied to achieve the best fit.

**Additional computational details.** MULTIMODE is a program for vibrational calculation, which has been discussed in detailed and applied to various systems.<sup>3</sup> Generally speaking, the MULTIMODE calculation uses Watson Hamiltonian with mass-scaled normal coordinates. The key feature of MULTIMODE is to expand the full potential to a hierarchy  $n$ -mode representation, which greatly reduces the multi-dimensional integration. The CH<sub>3</sub>CHOO molecule has 18 degrees of freedom, and we use 4-mode representation in our study.

The Watson Hamiltonian is rigorous for semi-rigid molecules, which is not obviously the case for *syn*- and *anti*-CH<sub>3</sub>CHOO with the internal torsion motion. However, from a recent Diffusion Monte Carlo calculation,<sup>4</sup> the ground state wave functions are localized, and can be applied with the semi-rigid approach. Since the energies of highly excited states of torsion mode exceed the torsion barrier height, 730 and 427  $\text{cm}^{-1}$  for *syn*- and *anti*-CH<sub>3</sub>CHOO, respectively, the excitation

of torsion mode is restricted to 2 to avoid any unreasonable couplings with torsion mode. The semi-rigid treatment for *anti*-CH<sub>3</sub>CHOO is more problematic, especially for "hot bands", than for *syn*-CH<sub>3</sub>CHOO because the barrier to internal rotation for the *anti*-conformer is roughly 300 cm<sup>-1</sup> lower than for the *syn*-conformer.<sup>4</sup>

Thirteen harmonic oscillator basis are used for each mode in the first vibrational self-consistent field (VSCF) calculation. Then the VSCF virtual states are used as the basis-function for the following vibrational configuration-interaction (VCI) step. The size of VCI calculation is restricted by the maximum excitation of each mode and maximum sum of excitations of all modes. In the current study, all 18 vibration modes of CH<sub>3</sub>CHOO are included, and up to 4 modes can be excited simultaneously. As mentioned above, the maximum excitation of torsion mode is 2. To reduce the expense of calculation, the total excitation of four CH-stretching modes of CH<sub>3</sub>CHOO is limited to 3. Since the frequencies of CH-stretching modes are far beyond the spectral range investigated, 800–1500 cm<sup>-1</sup>, such restrictions on CH stretch modes affect little the accuracy of the calculation. The maximum excitations of all other modes are 7. Cs symmetry is applied in the MULTIMODE calculation. The sizes of VCI matrix for the two Cs blocks are 22,157 and 17,924.

In addition, we performed another smaller set of calculations which only includes 13 modes of *syn*- and 14 modes of *anti*-conformer to compare with the calculations that includes all 18 modes. For *syn*-conformer, the frequencies of nine vibration modes are in the measured spectral range from 800 to 1500 cm<sup>-1</sup>, and ten such modes for *anti*-conformer. The smaller set calculation of 13 modes for *syn*-CH<sub>3</sub>CHOO includes such nine modes and four CH stretch modes, and similarly for calculation of the 14 modes for *anti*-CH<sub>3</sub>CHOO.

The hot-band transition can be calculated from MULTIMODE calculation as well. We present two sets of calculation results in Supplementary Table 6. One is from the calculation with all 18 modes coupling; another is from the smaller set of calculation with selected 13 modes for *syn*-conformer (14 modes for *anti*) as well as another two lowest frequency modes. As seen, relatively large deviation of the hot-band transition shift is observed between the experiment and MULTIMODE prediction. One main reason is the treatment of the torsional mode of CH<sub>3</sub>CHOO. As mentioned above, the maximum excitation of torsion mode is restricted to 2. Such restriction affects the calculated energies of torsion states and other modes with small energies. In addition, including the low-frequency modes enhances the coupling among states. For the ground state, the torsion splitting is small and such restriction has negligible effect to calculation. However, as the torsion mode is excited to the fundamental or overtone states, our "single-reference" treatment of torsion motion may be problematic. Nevertheless, the blue-shifted hot-band transition of these bands agrees with experiment simulation.

## Supplementary References

1. Western, C. M. PGOPHER, a program for simulating rotational structure, University of Bristol UK, version 7.1.108 (2010), <http://pgopher.chm.bris.ac.uk>.
2. Nakajima, M. & Endo, Y. Communication: Spectroscopic characterization of an alkyl substituted Criegee intermediate *syn*-CH<sub>3</sub>CHOO through pure rotational transitions. *J. Chem. Phys.* **140**, 011101 (2014).
3. Bowman, J. M., Carter, S. & Huang, X. MULTIMODE: A code to calculate rovibrational energies of polyatomic molecules. *Int. Rev. Phys. Chem.* **22**, 533–549 (2003).
4. Bowman, J. M., Wang, X. & Homayoon, Z. Ab initio Computational Spectroscopy and Vibrational Dynamics of Polyatomic Molecules: Applications to *syn* and *anti*-CH<sub>3</sub>CHOO and NO<sub>3</sub>. *J. Molec. Spectros* (2015). <http://dx.doi.org/10.1016/j.jms.2014.12.012>
